# Supplementary material for: Seasonal and annual variability of coastal sulphur plumes in the northern Benguela upwelling system
Source: PubMed Central journal article supplement (PMC5805238; doi:10.1371/journal.pone.0192140), 2018-02-08
Supplement: pone.0192140.s001.pdf [file pone.0192140.s001.pdf]

**Table 1. Investigation of the cloud impact on the seasonal and annual detection of sulphur patches in the study area.** The first part of the table represents the seasonal impact. For each month of the monthly climatology, the number of days per month (Ndm in days), the mean area-averaged cloud fraction (Mcfm) and their standard deviation ( $\sigma_{cfm}$ ), the number of days where the cloud fraction is above 2/3 on 3 consecutive days (Ncfm3d in days) and the corresponding percentages in relation to the number of days in the month (Ncfm3d in %) are given. The second part of the table represents the annual impact. For each year, the number of days per year (Ndy in days), the mean area-averaged cloud fraction (Mcfy) and their standard deviation ( $\sigma_{cfy}$ ), the number of days where the cloud fraction is above 2/3 on 3 consecutive days (Ncfy3d in days) and the corresponding percentages in relation to the number of days in the year (Ncfy3d in %) are given.

| month | Ndm in days | Mcfm      | $\sigma_{cfm}$ | Ncfm3d in days | Ncfm3d in % |
|-------|-------------|-----------|----------------|----------------|-------------|
| Jan   | 339         | 0.65      | 0.22           | 82             | 24.2        |
| Feb   | 311         | 0.66      | 0.21           | 78             | 25.1        |
| Mar   | 333         | 0.57      | 0.25           | 39             | 11.7        |
| Apr   | 329         | 0.47      | 0.28           | 30             | 9.1         |
| May   | 341         | 0.43      | 0.25           | 11             | 3.2         |
| Jun   | 330         | 0.40      | 0.28           | 7              | 2.1         |
| Jul   | 341         | 0.42      | 0.30           | 13             | 3.8         |
| Aug   | 342         | 0.54      | 0.30           | 33             | 9.6         |
| Sep   | 330         | 0.59      | 0.28           | 66             | 20.0        |
| Oct   | 341         | 0.57      | 0.27           | 40             | 11.7        |
| Nov   | 331         | 0.54      | 0.26           | 29             | 8.8         |
| Dec   | 334         | 0.59      | 0.23           | 46             | 13.8        |
| range | 311-342     | 0.40-0.66 | 0.21-0.30      | 7-82           | 2.1-25.1    |
| year  | Ndy in days | Mcfy      | $\sigma_{cfy}$ | Ncfy3d in days | Ncfy3d in % |
| 2002  | 365         | 0.52      | 0.27           | 43             | 11.8        |
| 2003  | 365         | 0.51      | 0.27           | 34             | 9.3         |
| 2004  | 366         | 0.54      | 0.28           | 44             | 12.0        |
| 2005  | 365         | 0.54      | 0.25           | 41             | 11.2        |
| 2006  | 365         | 0.53      | 0.29           | 59             | 16.2        |
| 2007  | 365         | 0.54      | 0.27           | 37             | 10.1        |
| 2008  | 366         | 0.54      | 0.27           | 49             | 13.4        |
| 2009  | 365         | 0.53      | 0.27           | 37             | 10.1        |
| 2010  | 365         | 0.55      | 0.29           | 59             | 16.2        |
| 2011  | 365         | 0.54      | 0.28           | 53             | 14.5        |
| 2012  | 366         | 0.53      | 0.27           | 25             | 6.8         |
| range | 365-366     | 0.51-0.55 | 0.25-0.29      | 25-59          | 6.8-16.2    |
