# Supplementary material for: Seasonal and annual variability of coastal sulphur plumes in the northern Benguela upwelling system
Source: PubMed Central journal article supplement (PMC5805238; doi:10.1371/journal.pone.0192140), 2018-02-08
Supplement: pone.0192140.s002.pdf [file pone.0192140.s002.pdf]

The method for the identification of sulphur plumes is based on the different optical water properties [1]. The sulphur plumes in the Namibian coastal area are clearly distinguished from other optical water masses by their special spectral signatures (Fig 1, Tab 1). The spectral peaks of unaffected onshore and offshore waters, algae blooms and river plumes vary between the blue and green wavelength range depending on the composition of optically active water constituents like chlorophyll-a, yellow substances and suspended matter. In contrast to the sulphur plumes, most of these unaffected spectra are influenced by the absorption of chlorophyll-a at MERIS bands of 442.4 and 664.6 nm. The offshore waters with low chlorophyll-a concentration are identified by their maxima in the blue MERIS channel of 412.5 nm. Water masses with high concentrations of suspended or resuspended matter like the river plume of the Orange River and the nearest coastal located onshore waters are differentiated from sulphur plumes by their different spectral slopes in the red wavelength range.

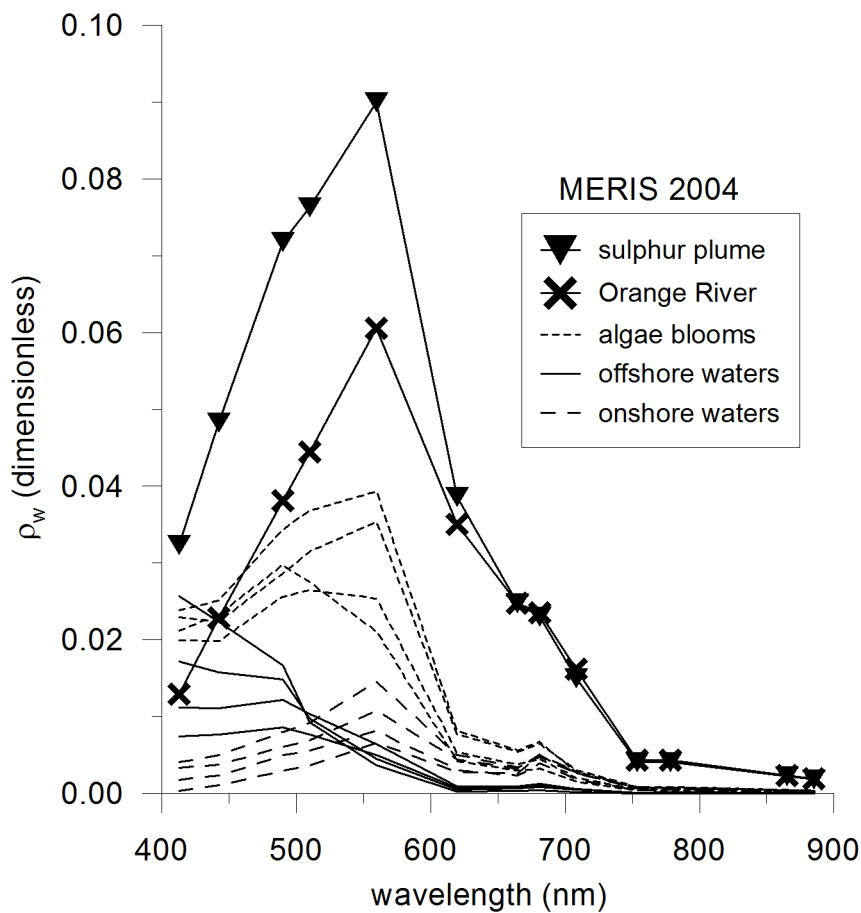

**Fig 1. Comparison of spectral properties of different optical water masses.** The mean spectral curves represent the optical water masses like onshore and offshore waters, algae blooms, river discharges and sulphur plumes in 2004.

**Table 1. Spectral data.**

| MERIS         | sulphur plume             | Orange river              | 1-algal bloom             | 2-algal bloom             | 3-algal bloom             |
|---------------|---------------------------|---------------------------|---------------------------|---------------------------|---------------------------|
| wavelength/nm | reflectance/dimensionless | reflectance/dimensionless | reflectance/dimensionless | reflectance/dimensionless | reflectance/dimensionless |
| 413           | 0.03234                   | 0.01293                   | 0.02382                   | 0.02296                   | 0.01993                   |
| 442           | 0.04830                   | 0.02283                   | 0.02513                   | 0.02238                   | 0.01984                   |
| 490           | 0.07177                   | 0.03816                   | 0.03435                   | 0.02864                   | 0.02561                   |
| 510           | 0.07630                   | 0.04442                   | 0.03680                   | 0.03146                   | 0.02648                   |
| 560           | 0.08995                   | 0.06052                   | 0.03934                   | 0.03541                   | 0.02540                   |
| 620           | 0.03865                   | 0.03503                   | 0.00818                   | 0.00772                   | 0.00535                   |
| 665           | 0.02477                   | 0.02480                   | 0.00564                   | 0.00542                   | 0.00379                   |
| 681           | 0.02303                   | 0.02351                   | 0.00673                   | 0.00649                   | 0.00451                   |
| 708           | 0.01505                   | 0.01622                   | 0.00281                   | 0.00305                   | 0.00203                   |
| 753           | 0.00409                   | 0.00433                   | 0.00070                   | 0.00085                   | 0.00052                   |
| 778           | 0.00413                   | 0.00432                   | 0.00079                   | 0.00086                   | 0.00058                   |
| 865           | 0.00225                   | 0.00234                   | 0.00043                   | 0.00047                   | 0.00032                   |
| 885           | 0.00183                   | 0.00191                   | 0.00035                   | 0.00039                   | 0.00026                   |

| MERIS         | 4-algal bloom             | 1-offshore water          | 2-offshore water          | 3-offshore water          | 4-offshore water          |
|---------------|---------------------------|---------------------------|---------------------------|---------------------------|---------------------------|
| wavelength/nm | reflectance/dimensionless | reflectance/dimensionless | reflectance/dimensionless | reflectance/dimensionless | reflectance/dimensionless |
| 413           | 0.02117                   | 0.02569                   | 0.01714                   | 0.01121                   | 0.00744                   |
| 442           | 0.02334                   | 0.02236                   | 0.01575                   | 0.01107                   | 0.00767                   |
| 490           | 0.02973                   | 0.01670                   | 0.01484                   | 0.01219                   | 0.00858                   |
| 510           | 0.02753                   | 0.00927                   | 0.00976                   | 0.01034                   | 0.00765                   |
| 560           | 0.02108                   | 0.00366                   | 0.00454                   | 0.00639                   | 0.00502                   |
| 620           | 0.00421                   | 0.00024                   | 0.00052                   | 0.00096                   | 0.00080                   |
| 665           | 0.00299                   | 0.00033                   | 0.00067                   | 0.00093                   | 0.00071                   |
| 681           | 0.00322                   | 0.00040                   | 0.00083                   | 0.00129                   | 0.00102                   |
| 708           | 0.00153                   | 0.00016                   | 0.00047                   | 0.00062                   | 0.00061                   |
| 753           | 0.00039                   | 0.00005                   | 0.00011                   | 0.00006                   | 0.00008                   |
| 778           | 0.00043                   | 0.00004                   | 0.00013                   | 0.00016                   | 0.00016                   |
| 865           | 0.00024                   | 0.00002                   | 0.00007                   | 0.00009                   | 0.00009                   |
| 885           | 0.00019                   | 0.00002                   | 0.00006                   | 0.00007                   | 0.00007                   |

| MERIS         | 1-onshore water           | 2-onshore water           | 3-onshore water           | 4-onshore water           |
|---------------|---------------------------|---------------------------|---------------------------|---------------------------|
| wavelength/nm | reflectance/dimensionless | reflectance/dimensionless | reflectance/dimensionless | reflectance/dimensionless |
| 413           | 0.00410                   | 0.00337                   | 0.00179                   | 0.00032                   |
| 442           | 0.00498                   | 0.00377                   | 0.00232                   | 0.00107                   |
| 490           | 0.00802                   | 0.00608                   | 0.00497                   | 0.00298                   |
| 510           | 0.00920                   | 0.00693                   | 0.00562                   | 0.00363                   |
| 560           | 0.01456                   | 0.01076                   | 0.00818                   | 0.00658                   |
| 620           | 0.00502                   | 0.00443                   | 0.00305                   | 0.00280                   |
| 665           | 0.00339                   | 0.00320                   | 0.00234                   | 0.00261                   |
| 681           | 0.00472                   | 0.00510                   | 0.00393                   | 0.00499                   |
| 708           | 0.00258                   | 0.00268                   | 0.00183                   | 0.00264                   |
| 753           | 0.00069                   | 0.00084                   | 0.00040                   | 0.00077                   |
| 778           | 0.00072                   | 0.00076                   | 0.00052                   | 0.00073                   |
| 865           | 0.00040                   | 0.00042                   | 0.00029                   | 0.00040                   |
| 885           | 0.00033                   | 0.00035                   | 0.00023                   | 0.00033                   |

## References

1. Ohde T, Siegel H, Reißmann J, Gerth M. Identification and investigation of sulphur plumes along the Namibian coast using the MERIS sensor. *Continental Shelf Research*. 2007; 27:744-756.
