# Supplementary material for: Seasonal and annual variability of coastal sulphur plumes in the northern Benguela upwelling system
Source: PLoS One. 2018 Feb 8;13(2):e0192140. doi: 10.1371/journal.pone.0192140 (PMC5805238; doi:10.1371/journal.pone.0192140)
Supplement: S7 Table — (XLS) [file pone.0192140.s009.xls]

## Sheet: Sheet1
	sulphur plumes size	sulphur plumes intensity – reflectance(559.6 nm)	CCMP – wind speed	TMI – wind speed	QuikScat – wind speed	ASCAT – wind speed	CCMP – v-pseudo wind stress	QuikScat – v-pseudo wind stress	ASCAT – v-pseudo wind stress	CCMP – u-pseudo wind stress	QuikScat – u-pseudo wind stress	ASCAT – u-pseudo wind stress	TMI – SST	MODIS – SST
year	anomaly/km2	anomaly/dimensionless	anomaly/ms-1	anomaly/ms-1	anomaly/ms-1	anomaly/ms-1	anomaly/m2s-2	anomaly/m2s-2	anomaly/m2s-2	anomaly/m2s-2	anomaly/m2s-2	anomaly/m2s-2	anomaly/°C	anomaly/°C
2002	-3210	-0.0065	-0.14	-0.09	-0.07		-1.11	-0.89		0.2	-0.14		-0.12	-0.48
2003	-2358	-0.00671	0.04	0.31	0.19		0.24	0.47		0.82	0.06		0.08	-0.09
2004	2057	-0.00163	-0.24	-0.14	-0.09		-2.32	-2.1		1.24	0.69		0.3	0.22
2005	8899	0.01238	-0.27	-0.15	-0.2		-2.71	-2.49		1.34	1.39		0.42	0.27
2006	-1783	-0.00211	0.02	0.17	0.12		-0.14	0.09		0.16	-0.34		-0.27	-0.15
2007	-2603	-0.00722	0.14	0.07	0.11	0.21	2.12	2.35	3.53	-0.44	0.66	-1.23	-0.21	-0.04
2008	-1731	0.00015	0.14	0.07	0.08	0.07	2.12	2.34	0.58	-0.01	-0.96	-0.72	-0.34	0.12
2009	-301	0	-0.07	-0.21	-0.14	-0.27	-0.99	0.23	-4.36	0.18	-1.35	0.85	0.38	0.26
2010	4363	0.01461	0.04	-0.26		-0.2	-1.23		-2.21	-1.24		2.62	0.19	0.02
2011	-1935	0.0008	0.34	0.27		0.12	4.02		1.19	-2.25		-0.48	-0.19	-0.06
2012	-1399	0.008		-0.03		0.07			1.28			-1.03	-0.25	-0.07
